# Supplementary material for: RETRACTED: Formyl Peptide Receptor 1 Signaling in Acute Inflammation and Neural Differentiation Induced by Traumatic Brain Injury
Source: PubMed Central journal article supplement (PMC7563302; doi:10.3390/biology9090238), 2020-08-20

24h

pp 38

p 38

75

50

37

25

20

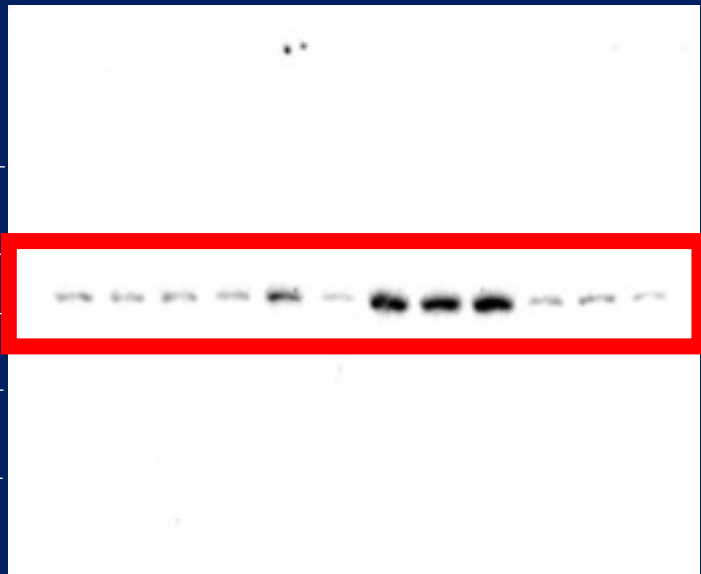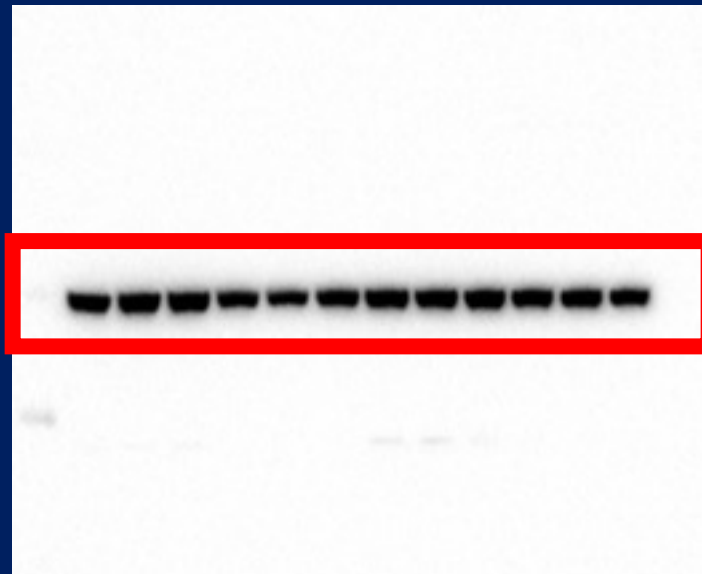

24h

P-ERK  
42/44KDa

ERK

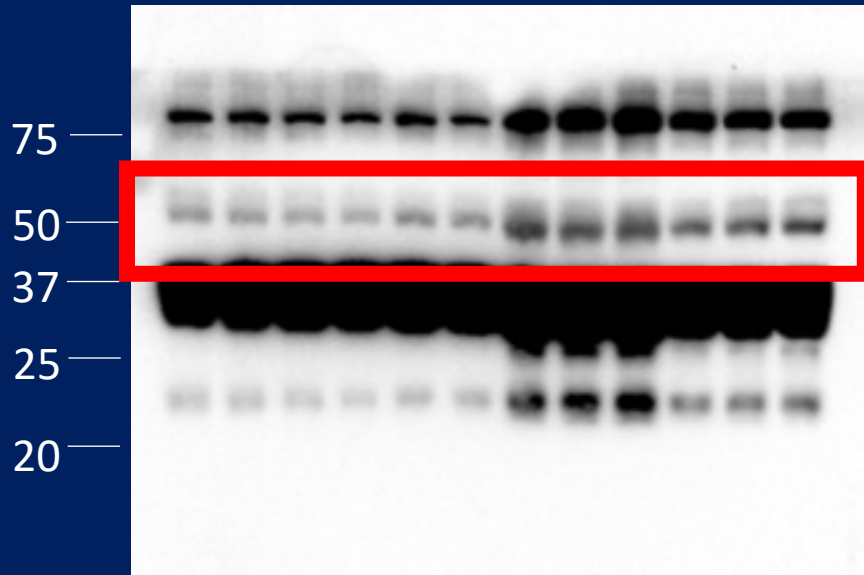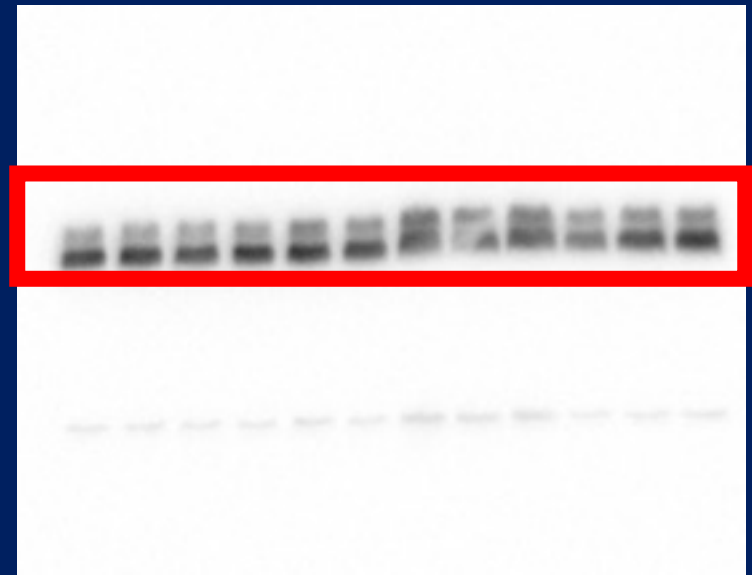

24h

I $\kappa$ B- $\alpha$  37KDa

$\beta$ -Actin

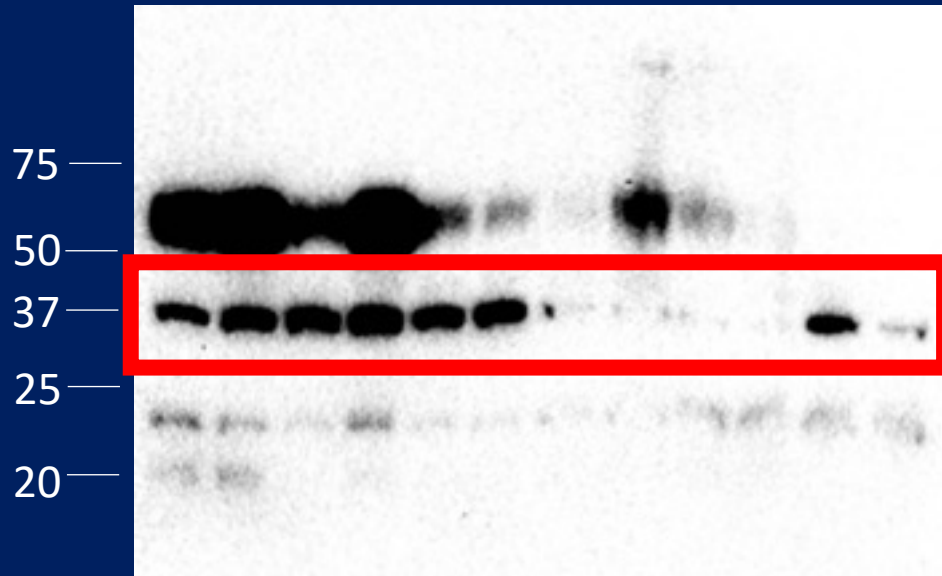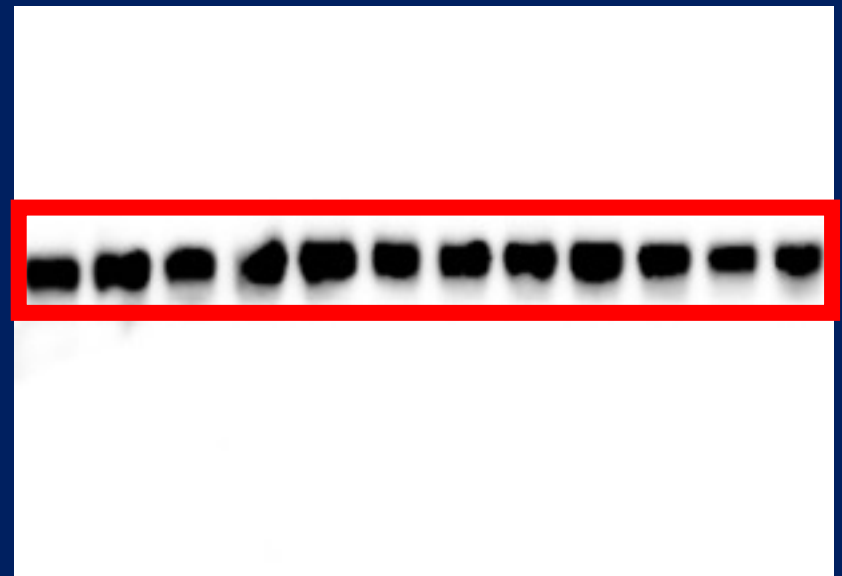

24h

NFkB 65KDa

Lamin A/C

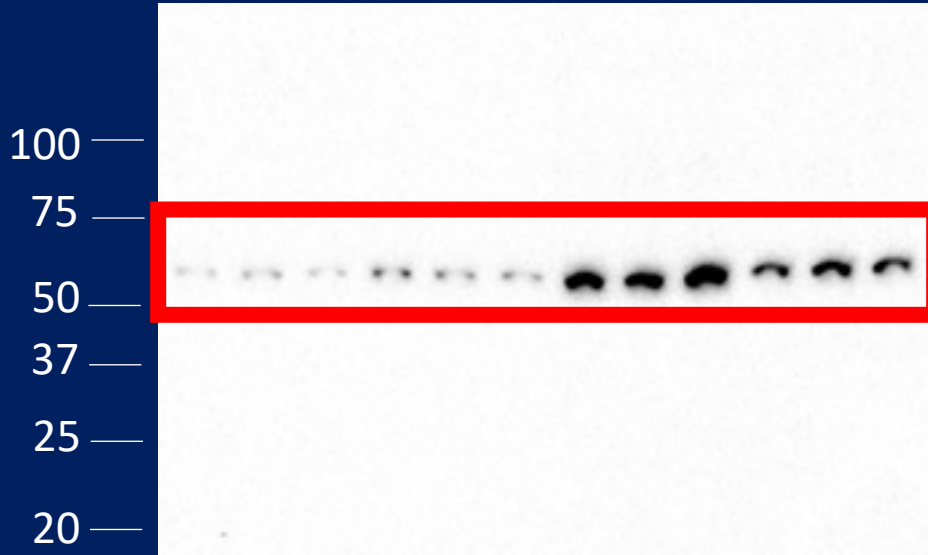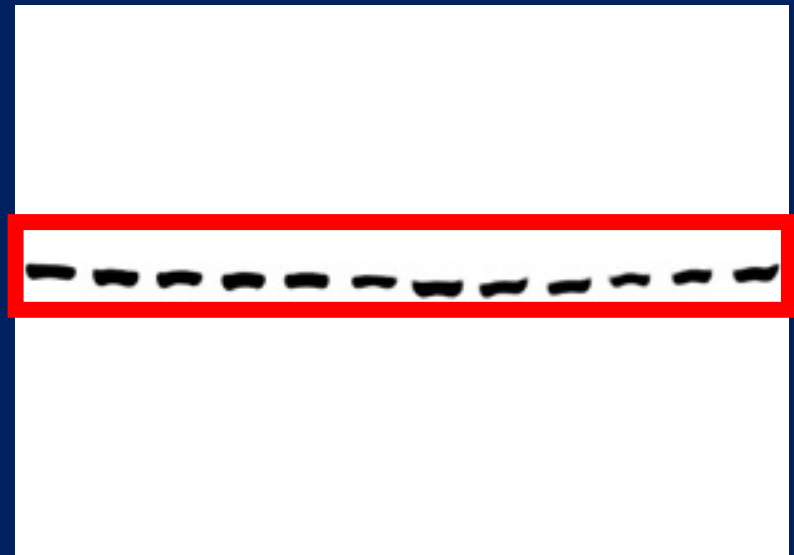



24h

ASC 24KDa

$\beta$ -Actin

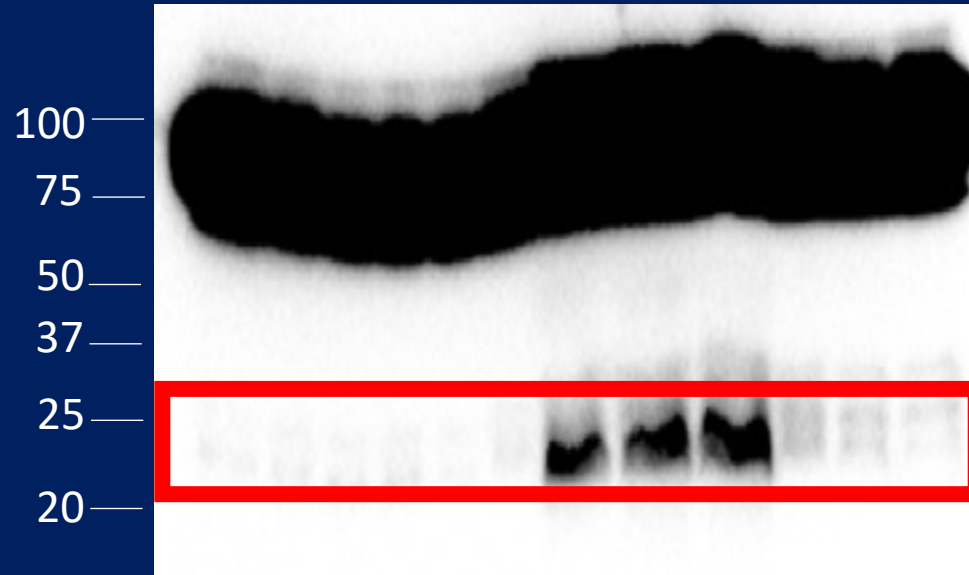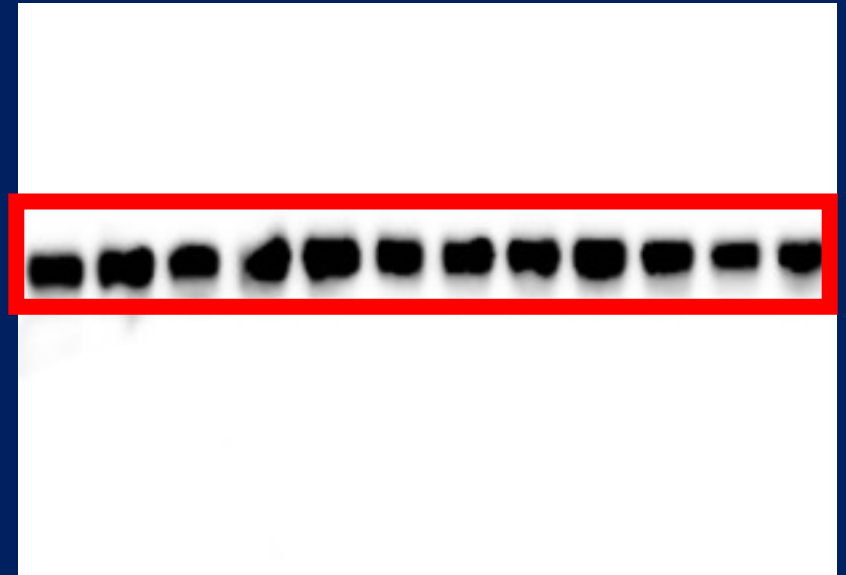

24h

Caspase- 1  
20KDa

$\beta$ -Actin

100 —  
75 —  
50 —  
37 —  
25 —  
20 —

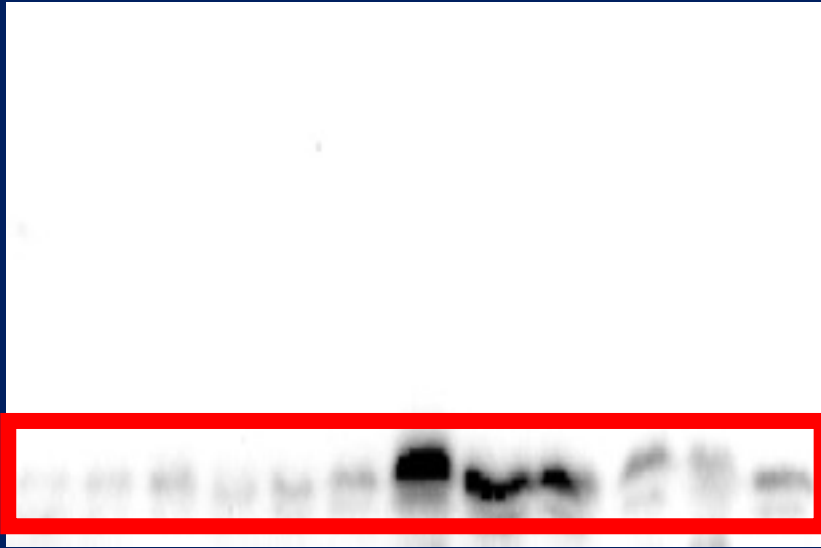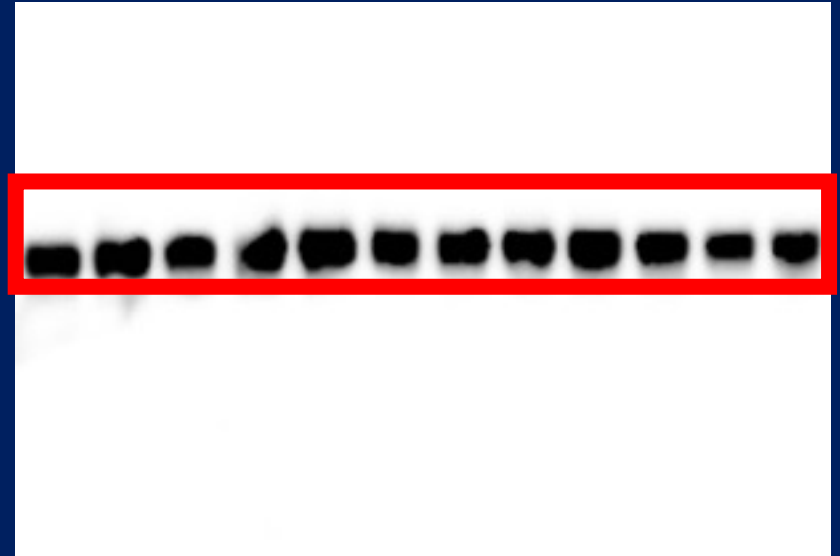

24h

iNOS 130 KDa

$\beta$ -Actin

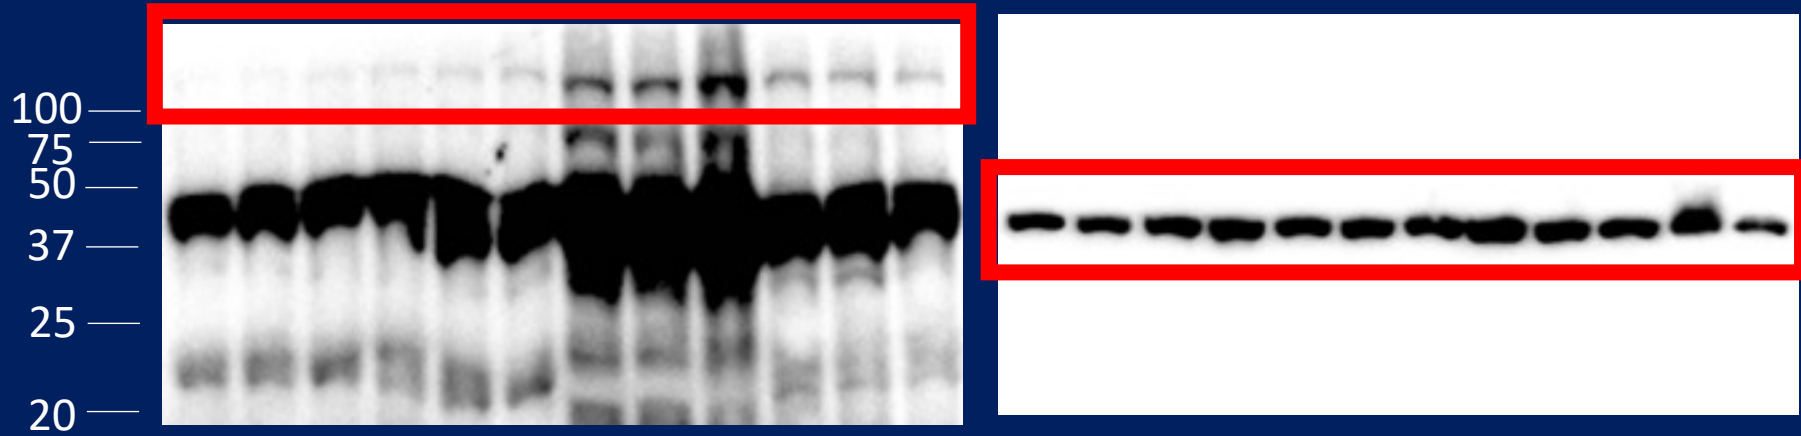



24h

MnSOD 24 KDa

$\beta$ -Actin

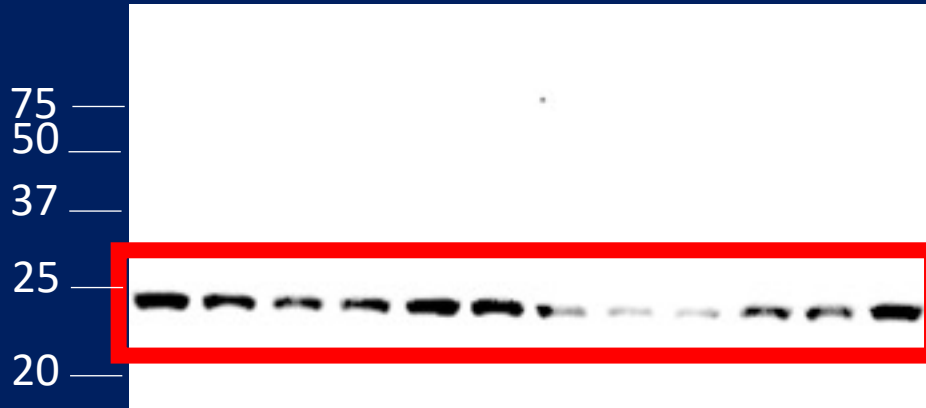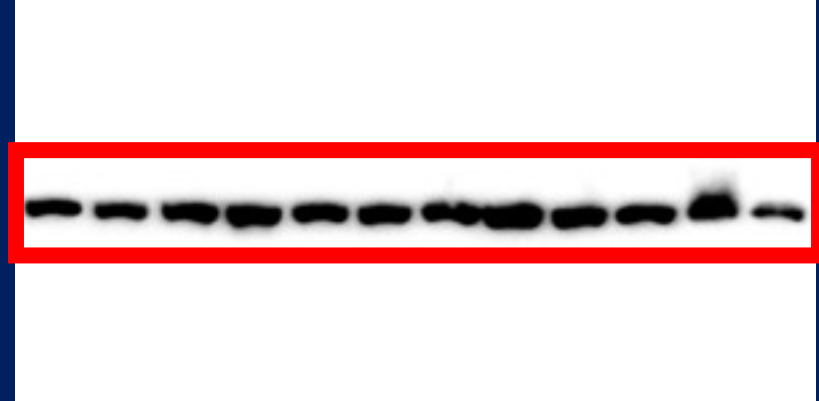

28days

P-AKT 60KDa

AKT

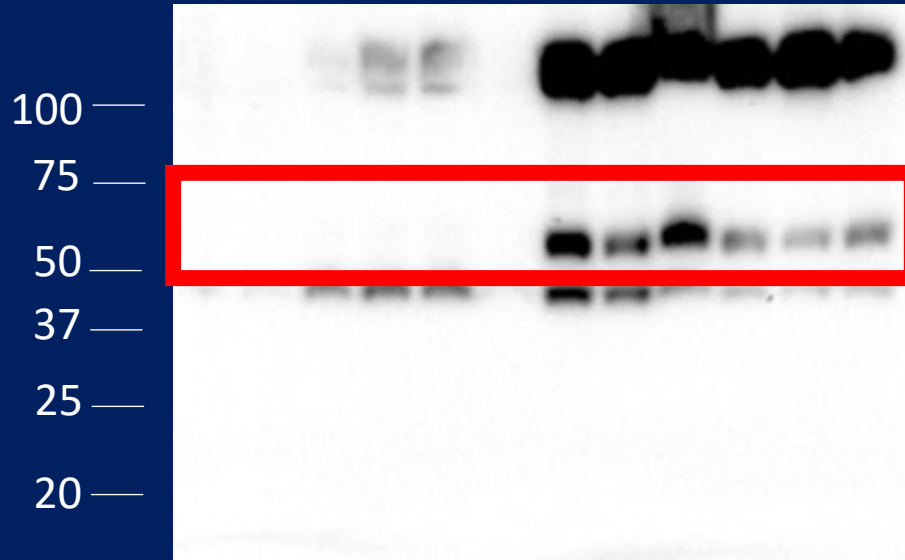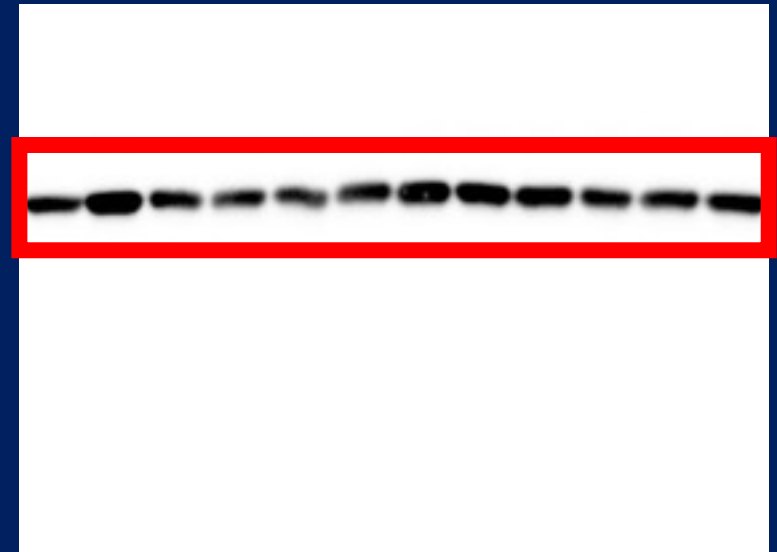

28days

Beta 3 tubulin  
55Kda

$\beta$ -Actin

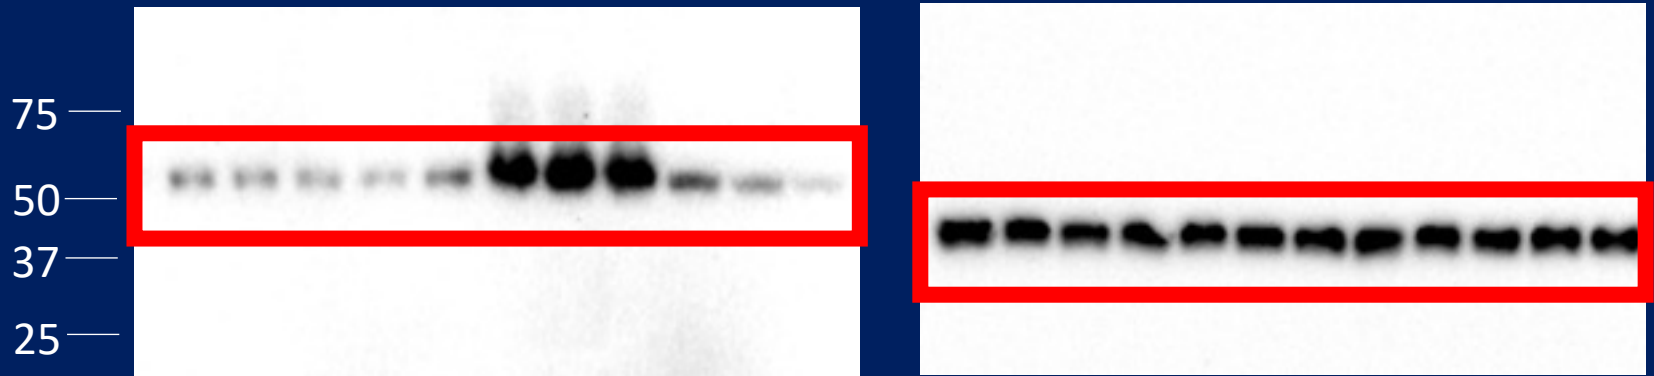

GFAP 50kDa

$\beta$ -Actin

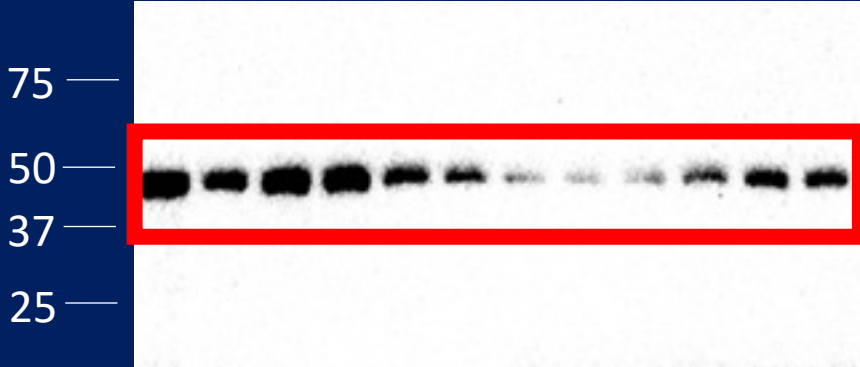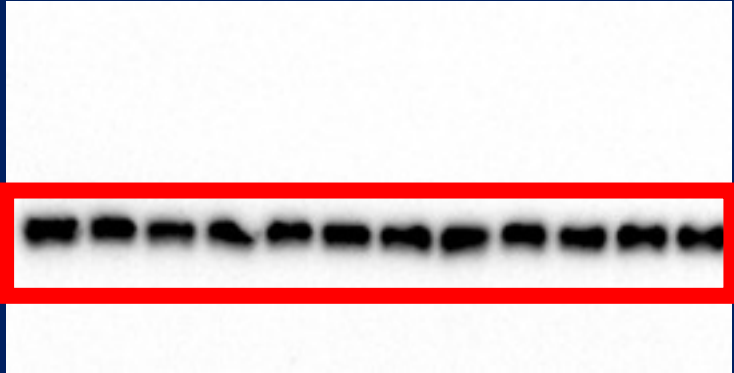

24h

COX-2 72kDa

$\beta$ -Actin

100—  
75—  
50—  
37—  
25—  
20—

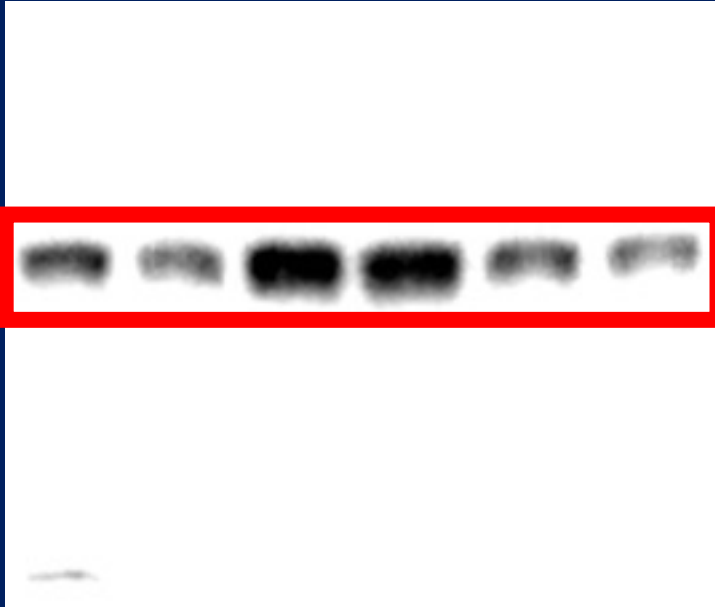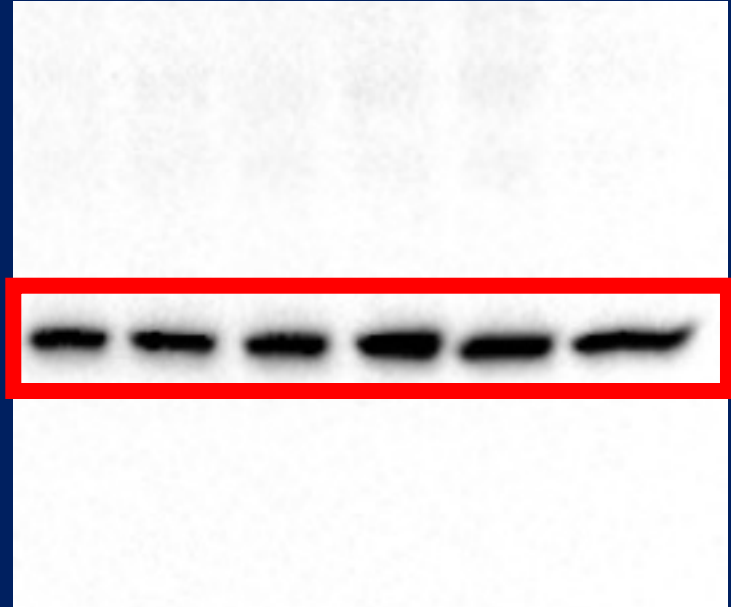

24h

PGE synthase 17kDa

$\beta$ -Actin

100 —  
75 —  
50 —  
37 —  
25 —  
20 —

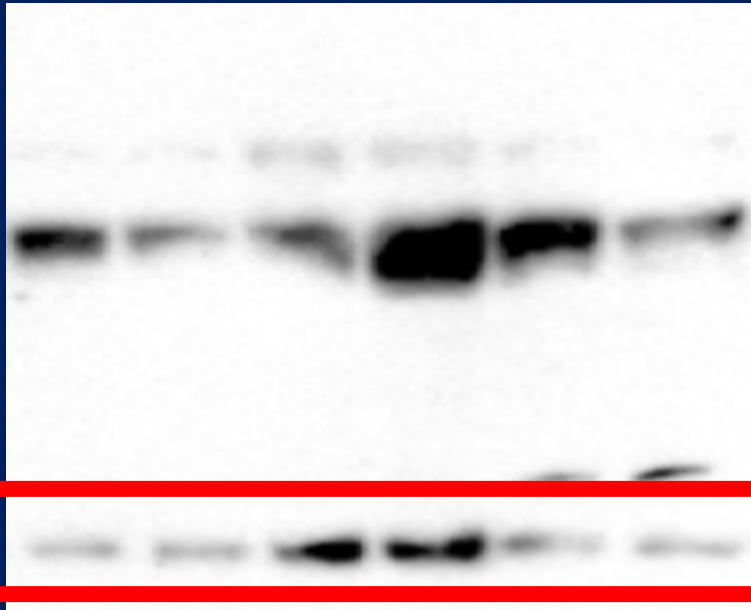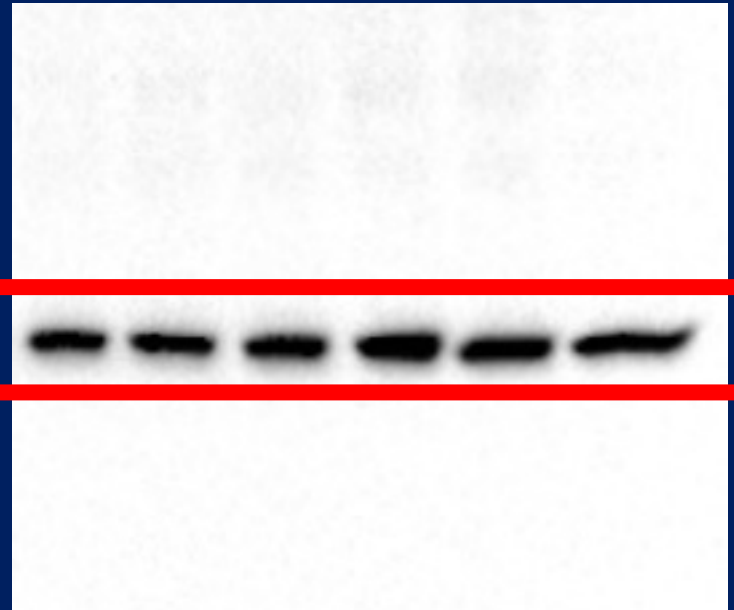

24h

PD2 synthase 21kDa

$\beta$ -Actin

100—  
75—  
50—  
37—  
25—  
20—

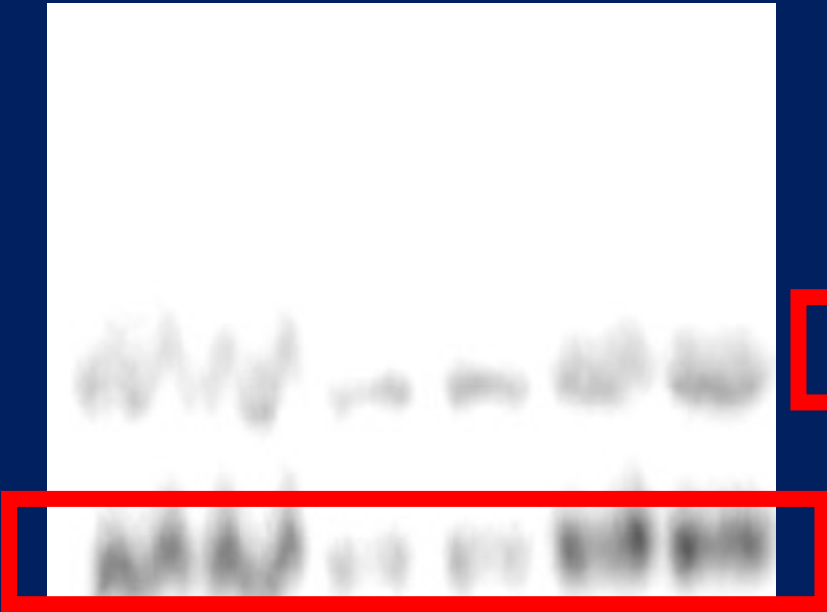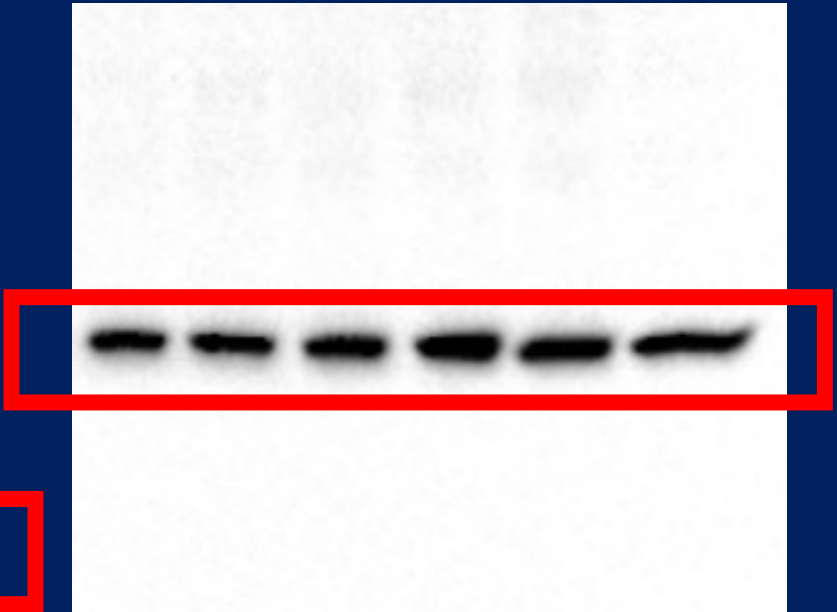

28days

iNOS 130kDa

$\beta$ -Actin

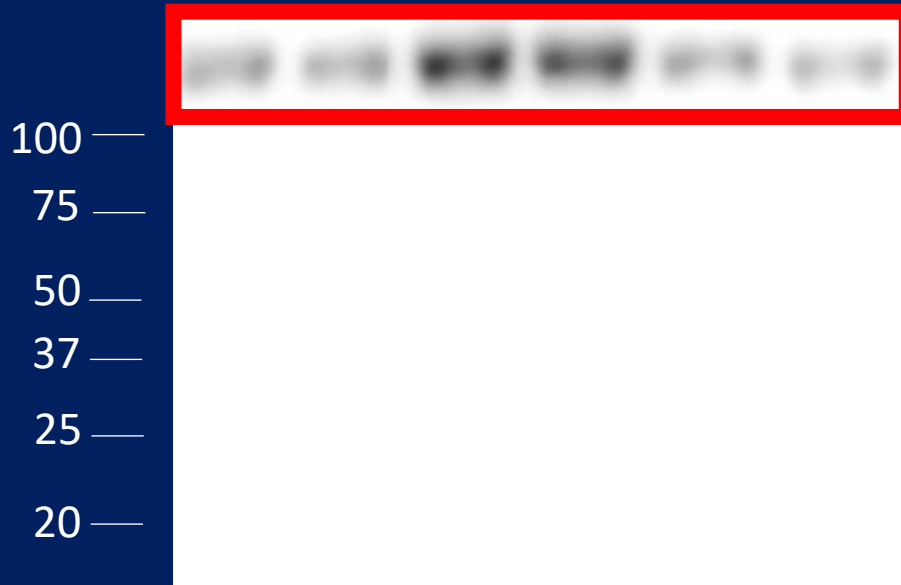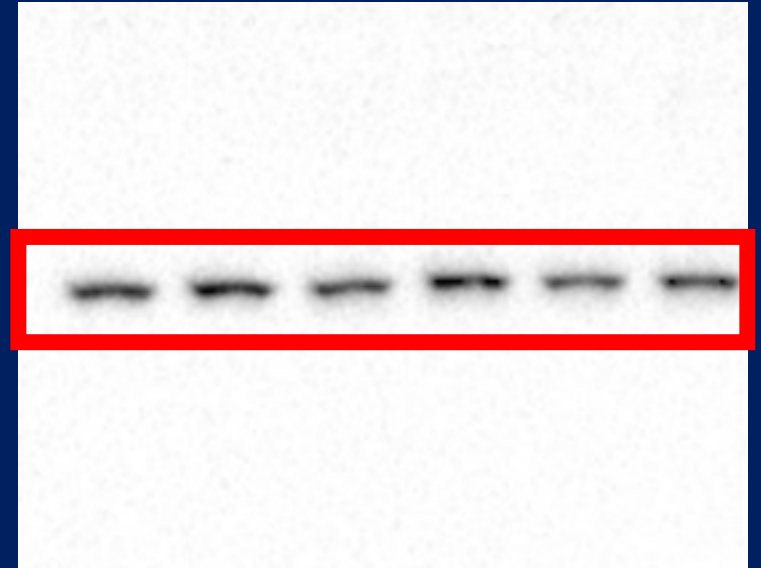



28days

COX-2 72kDa

100 —  
75 —  
50 —  
37 —  
25 —  
20 —

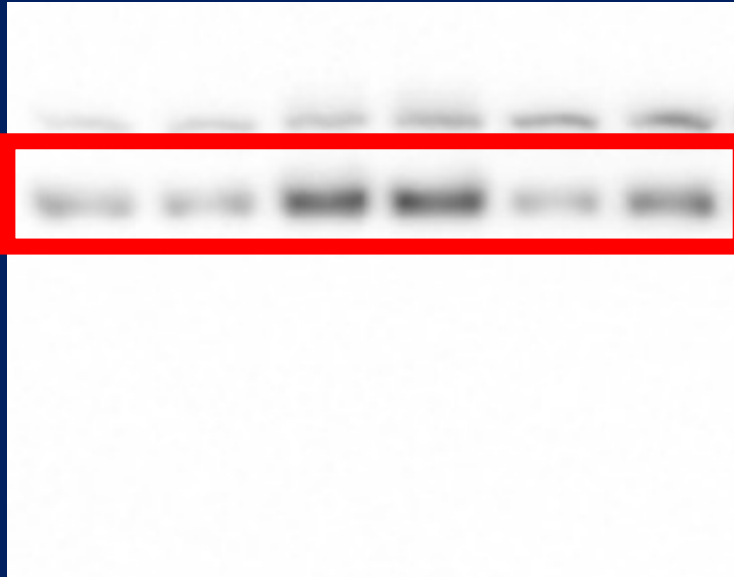

$\beta$ -Actin

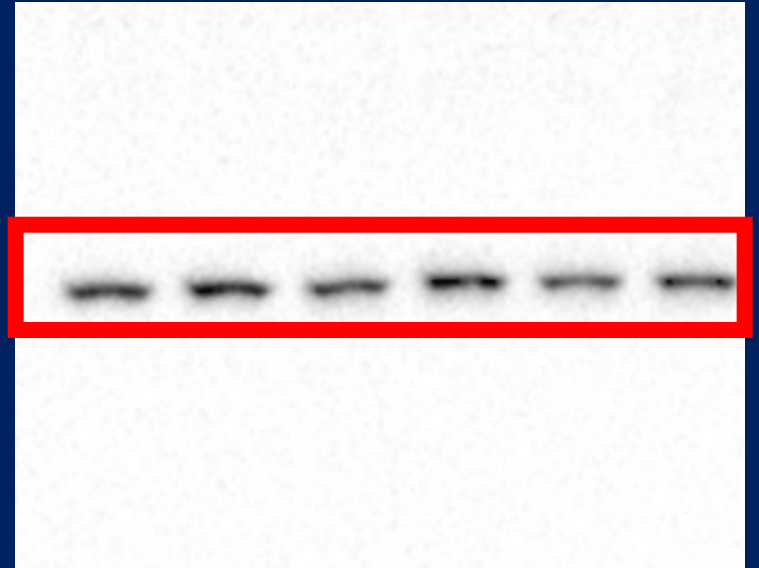

28days

PGE synthase 17kDa

$\beta$ -Actin

100 —  
75 —  
50 —  
37 —  
25 —  
20 —

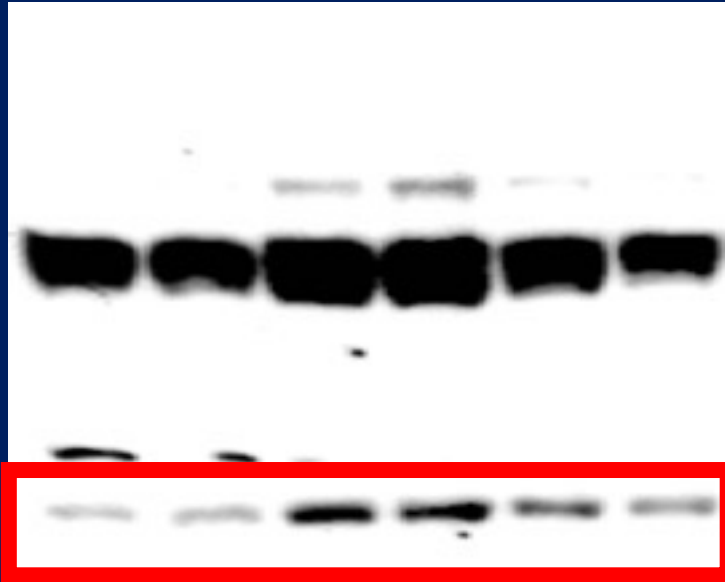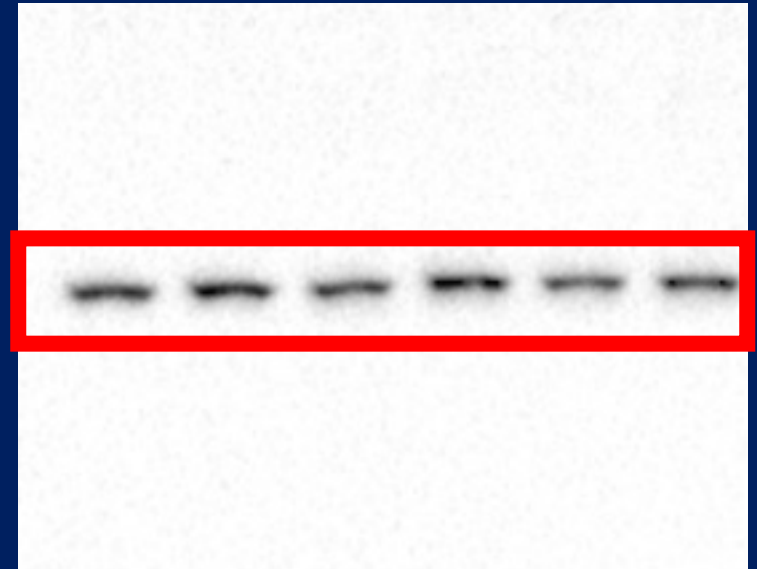

28days

PD2 synthase 21kDa

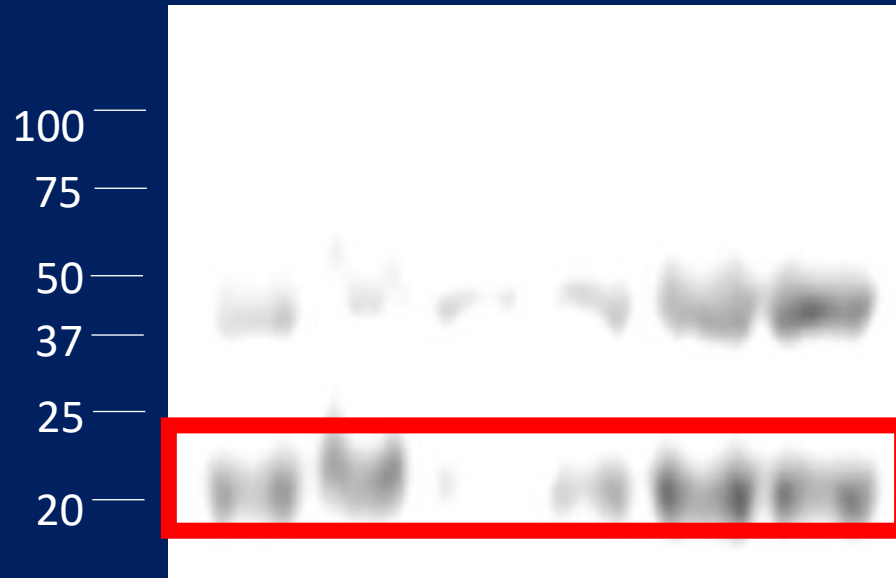

$\beta$ -Actin

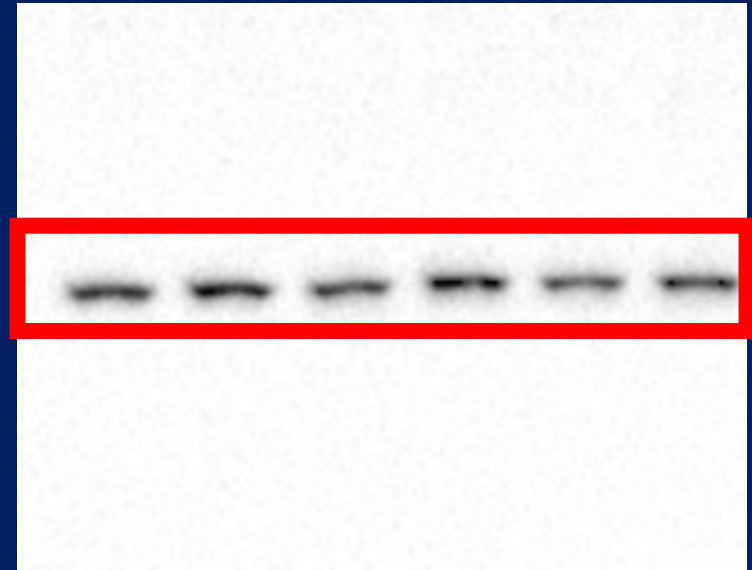

Supplement: biology-09-00238-s001.pdf [file biology-09-00238-s001.pdf]
